# Supplementary material for: Infection Process and Genome Assembly Provide Insights into the Pathogenic Mechanism of Destructive Mycoparasite Calcarisporium cordycipiticola with Host Specificity
Source: MDPI journal article supplement (doi:10.3390/jof7110918), 2021-10-28

**Figure S1.** Large-scale cultivation of *Cordyceps militaris* and white mildew disease. **(A)** Large-scale cultivation of *C. militaris*. **(B-D)** Diseased fruiting bodies of *C. militaris*.

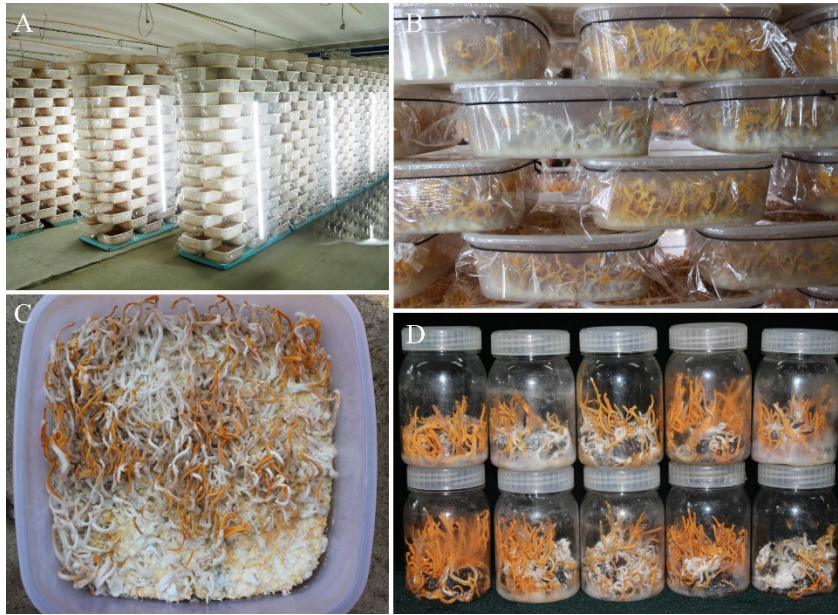

**Figure S2.** A flow chart of the whole experimental design.

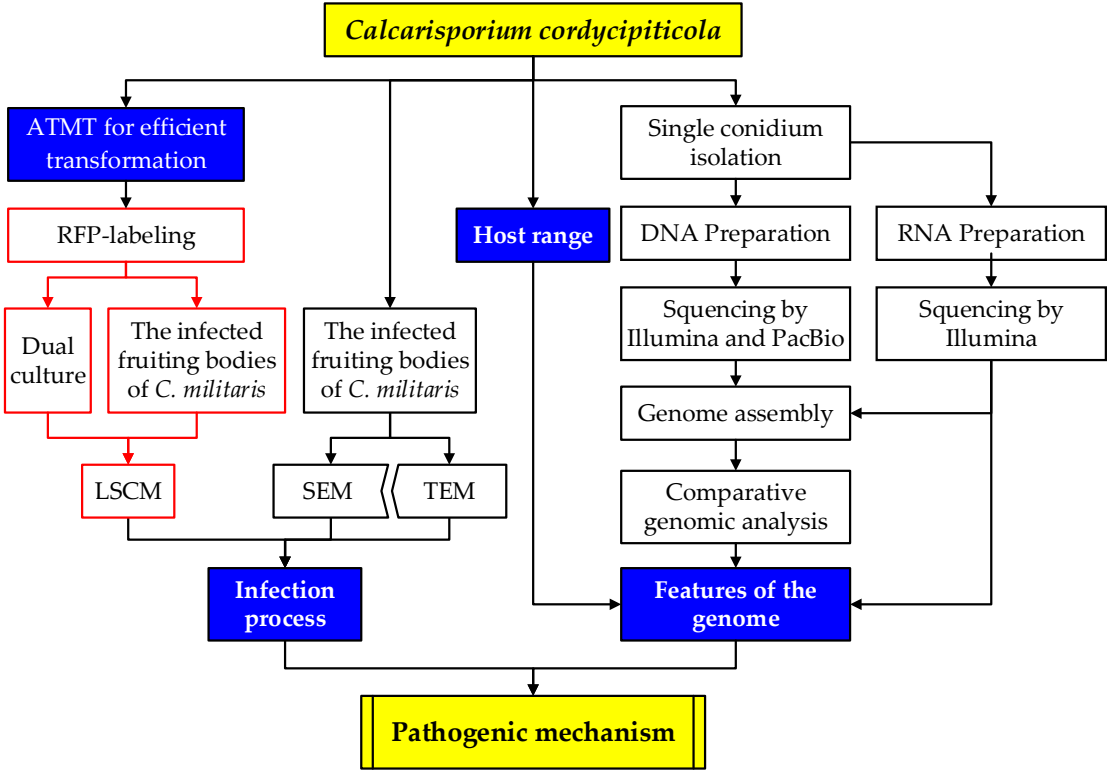

**Figure S3.** Antibiotic sensitivity assays for *Calcarisporium cordycipiticola*. (A-D) Different concentrations of geneticin, glufosinate-ammonium, bleomycin and hygromycin B.

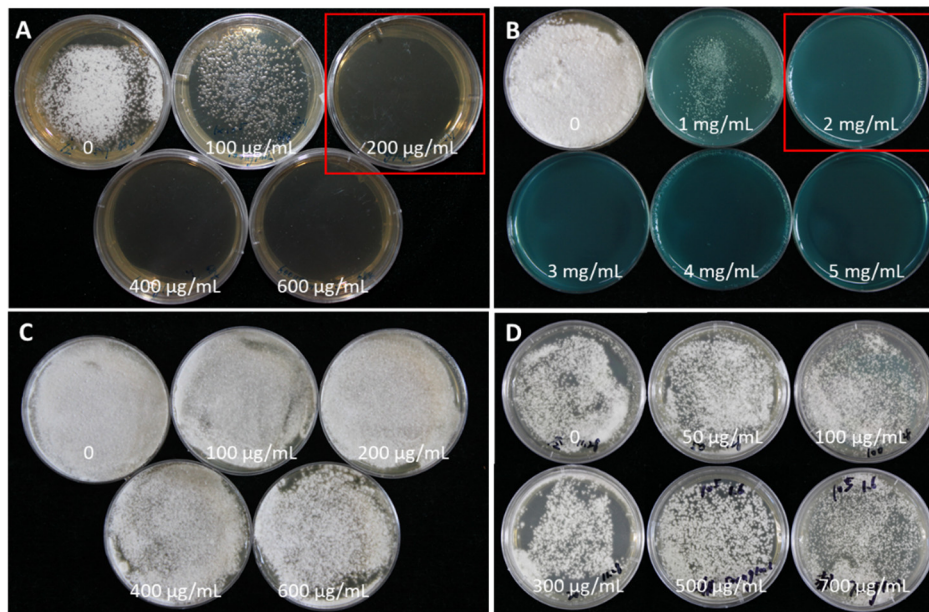

**Figure S4.** Optimization of ATMT in *Calcarisporium cordycipiticola*. **(A)** AS concentration was optimized under the condition of conidia density  $10^6$  conidia/mL, co-culture for 2 d and *A. tumefaciens* concentration of OD<sub>600</sub> 0.6. **(B)** Days of co-culture was optimized under the condition of *A. tumefaciens* OD<sub>600</sub> 0.8, conidia density  $10^8$  conidia/mL and AS concentration of 400  $\mu$ M. **(C)** Conidia density was optimized under the condition of *A. tumefaciens* OD<sub>600</sub> 0.8, co-culture for 2 d and AS concentration of 400  $\mu$ M. **(D)** *A. tumefaciens* density was optimized under the condition of conidia density  $10^7$ /conidia/mL, co-culture for 3 d and AS concentration of 400  $\mu$ M. All of the experiments were performed three times. The data are presented as means  $\pm$  SD (n=3). *t*-test results are shown: \*,  $P < 0.05$ ; \*\*,  $P < 0.01$ ; \*\*\*,  $P < 0.001$ .

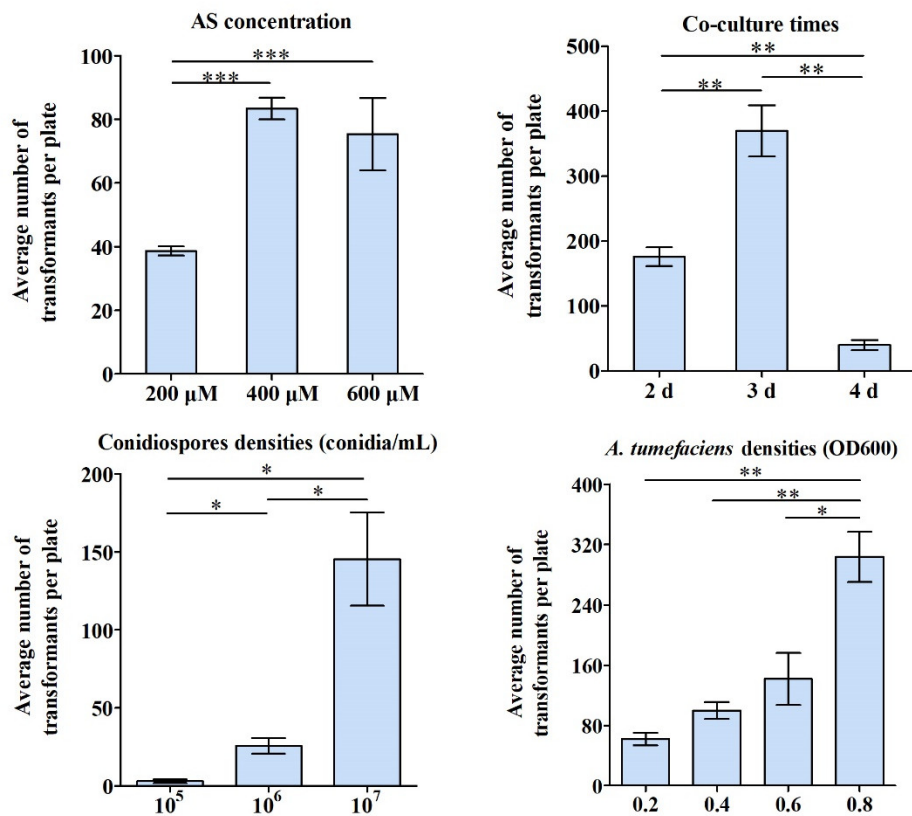

**Figure S5.** Validation of transformants expressing RFP of *Calcarisporium cordycipiticola*. **(A)**

PCR validation. **1** Marker. **2-10** Transformants. **11** Plasmid pFGL815-neoR-tubCp-RFP. **12**

Wild type of *C. cordycipiticola*. **(B)** Expression of the RFP in *C. cordycipiticola*. Scale bar =10

μm. DIC: different interference contrast.

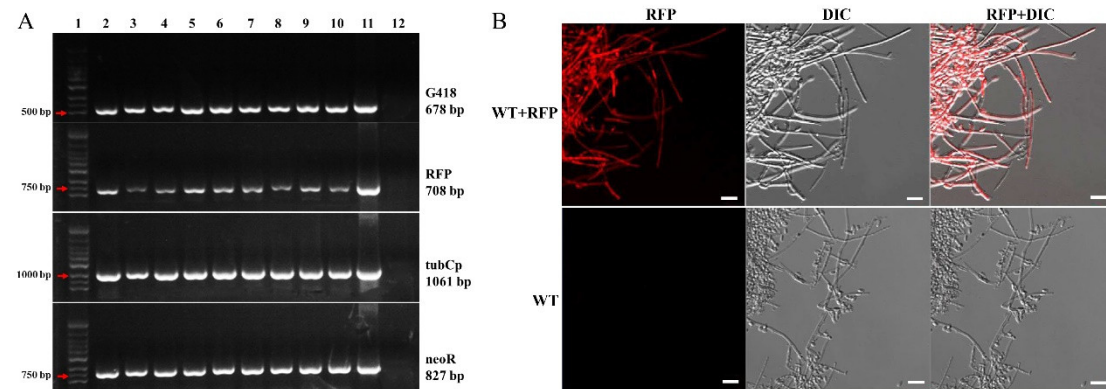

**Figure S6.** Interaction between *Cordyceps militaris* and *Calcarisporium cordycipiticola* in dual culture. **(A)** The hyphae of the touch point in dual culture observed by red fluorescent. **(B)** Overlay of fluorescent and brightfield micrographs. **(C)** Brightfield micrograph of B. **(D)** Dual culture of *C. militaris* and *C. cordycipiticola*. The inner illustration of B and C represented local enlargement. Scale bar = 2 cm in D and 10  $\mu$ m in A-C.

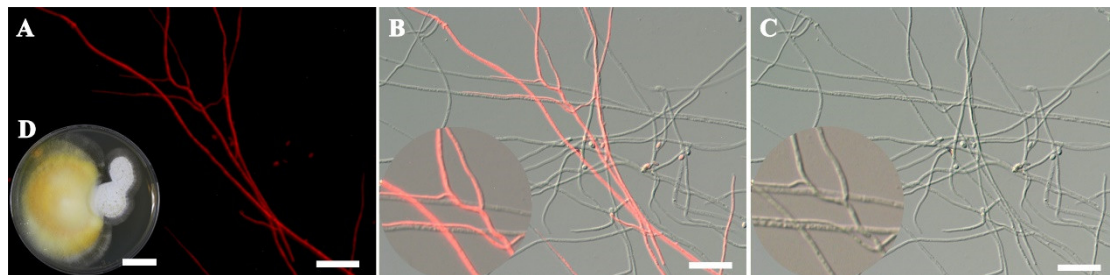

**Figure S7.** Statistical analysis for high quality reads of *Calcarisporium cordycipiticola* genome sequencing data. **(A)** K-mer distribution of Illumina NGS reads. The 400 bp library was subjected to paired-end 150 bp sequencing by Illumina HisSeq X10. The sequencing data (filtered reads: 5.50 Gbp; sequencing depth: 155×) were used to estimate the genome size, repeat content and heterozygosity. **(B)** Total of 6, 001, 867, 684 bp raw data and total of 5.93 Gbp clean data. 5, 933, 806, 642 reads with estimate the genome coverage 170× were obtained. Abscissa and vertical represent the subreads length, number of subread at specified length, respectively.

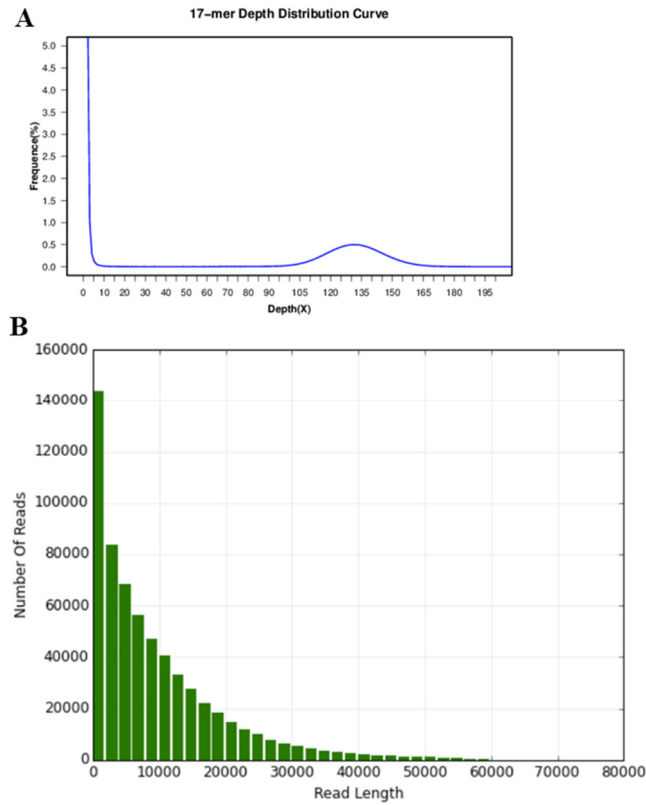

**Figure S8.** *Calcarisporium cordycipiticola* mitochondrion complete genome. Dark blue arrows represented tRNA genes. Red arrows represented rRNA genes. Wathet, purple and green arrows represented general coding protein genes.

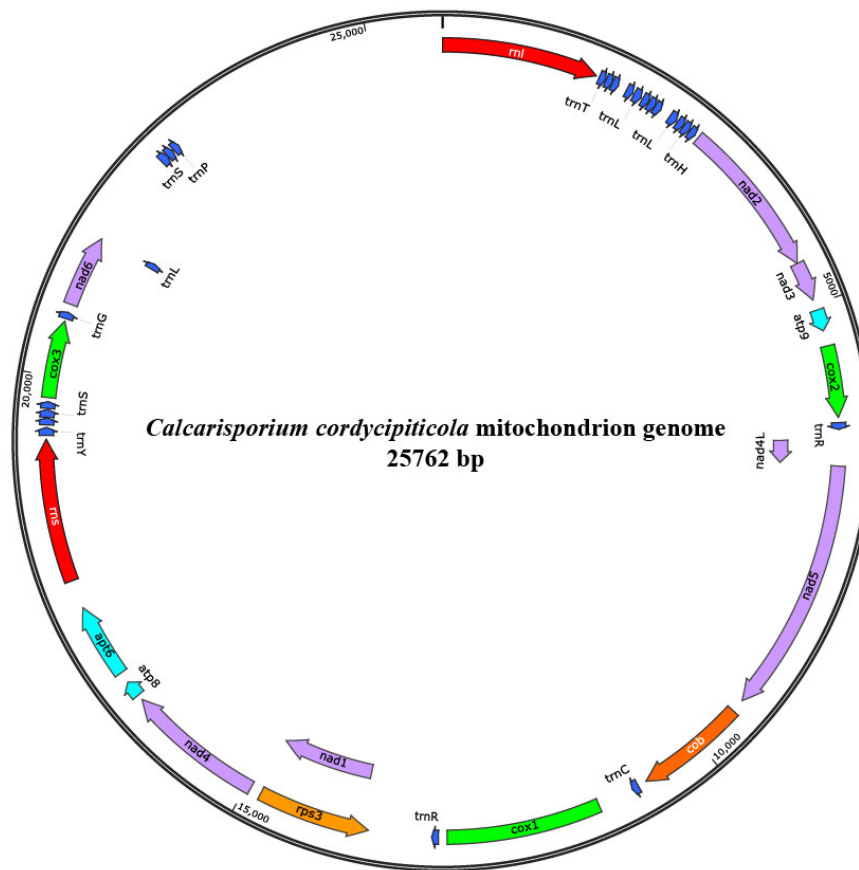



**Figure S9.** Evidence for gene prediction accuracy in *Calcarisporium cordycipiticola*. Three types of evidences were combined: functional annotation (at least one domain/motif), RNA-sequence support, orthologous genes between *C. cordycipiticola* and selected 10 fungi.

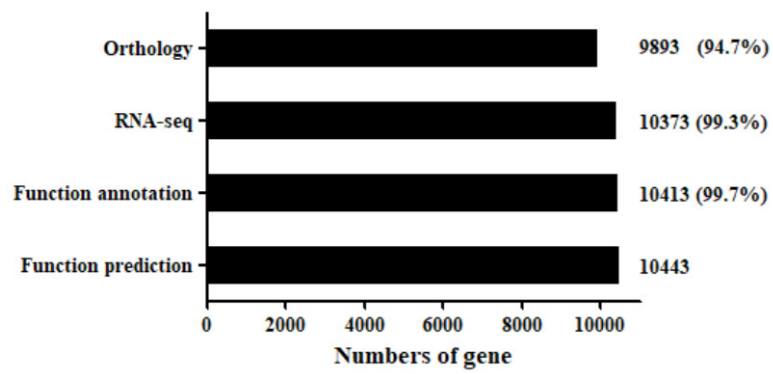

**Figure S10.** Histogram of KEGG distribution of predicted proteins of *Calcarisporium cordycipiticola*.

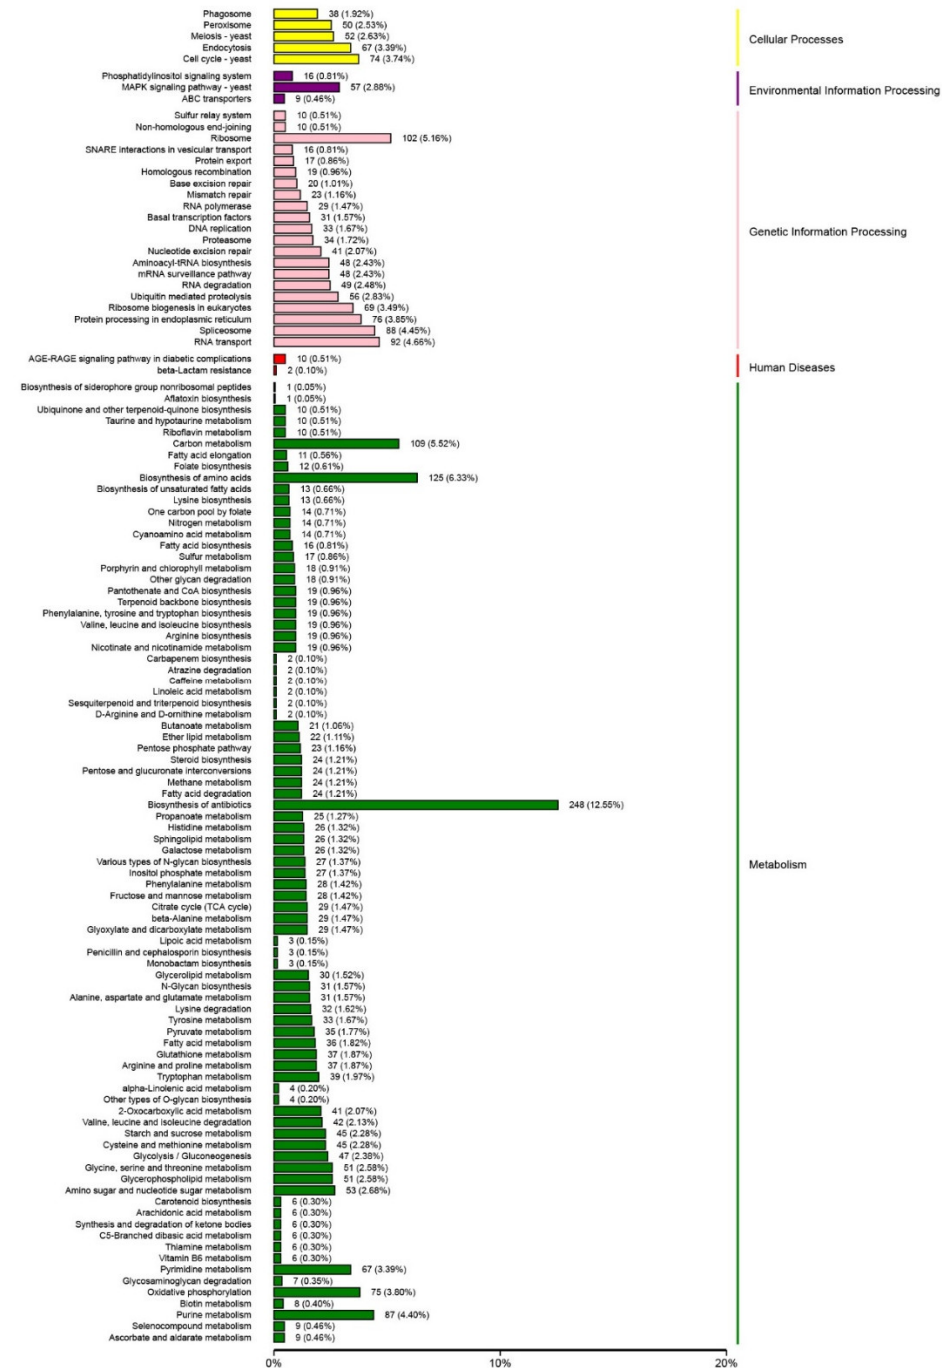

**Figure S11.** Families of transposase genes and estimation of RIP. (A) Families of transposase genes. (B) Estimation of RIP in *C. cordycipiticola*.

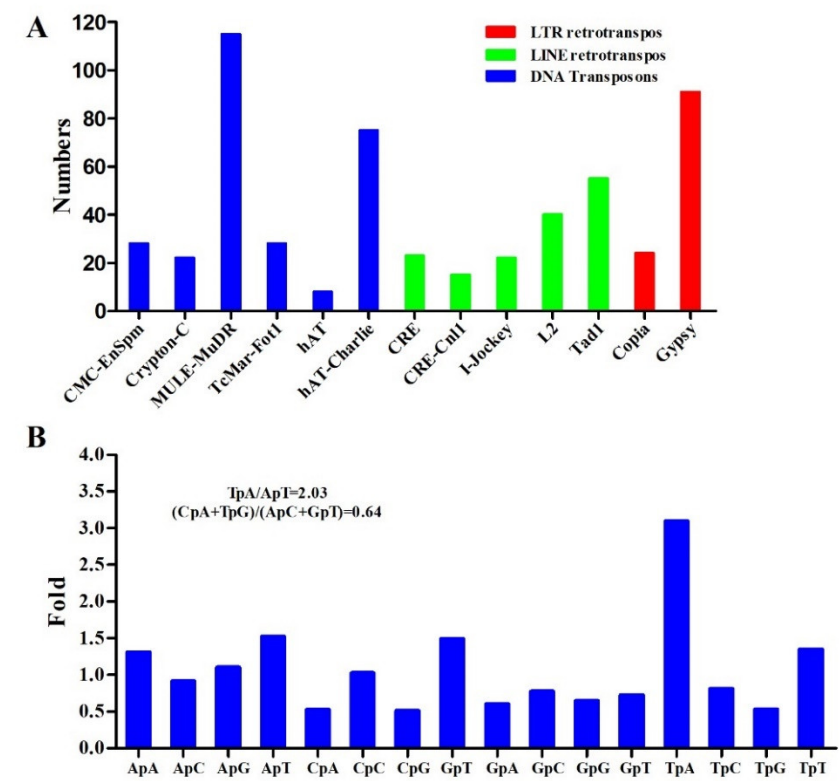

**Figure S12.** KEGG pathway enrichment analysis of the secreted proteins (A) and putative pathogenic factors annotated by PHI database (B) in *Calcarisporium cordycipiticola*.

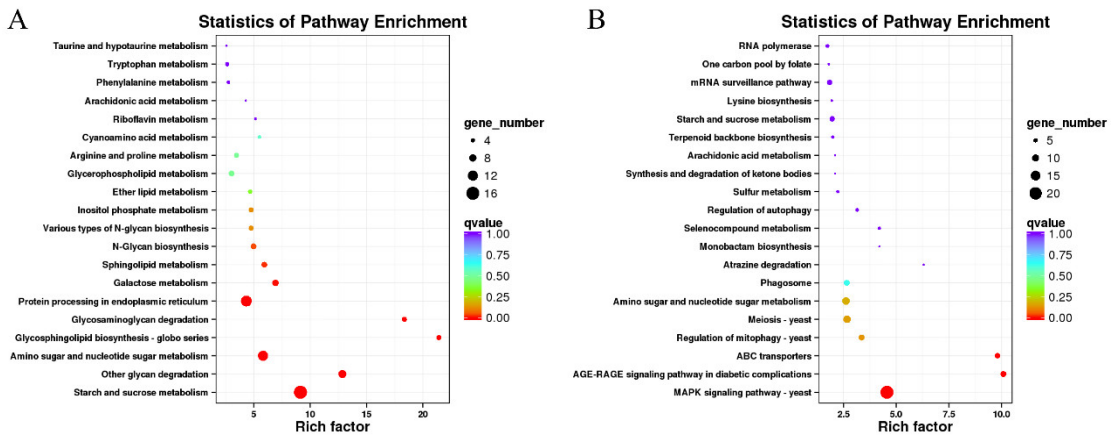

**Figure S13.** The putative pyranonigrins, depudecin and solanapyrone biosynthetic gene clusters of *Calcarisporium cordycipiticola* in this study. **(A)** Comparison of this cluster with the pyranonigrins cluster reported in *Aspergillus niger* CBS 513.88 and *Penicillium thymicola*. **(B)** Comparison with the depudecin cluster reported in *Alternaria brassicicola* ATCC 96836. **(C)** Comparison with the solanapyrone cluster reported in *Alternaria solani* ATCC 16683. The identity of each homologue to *C. cordycipiticola* CGMCC 5.2193 counterpart is shown.

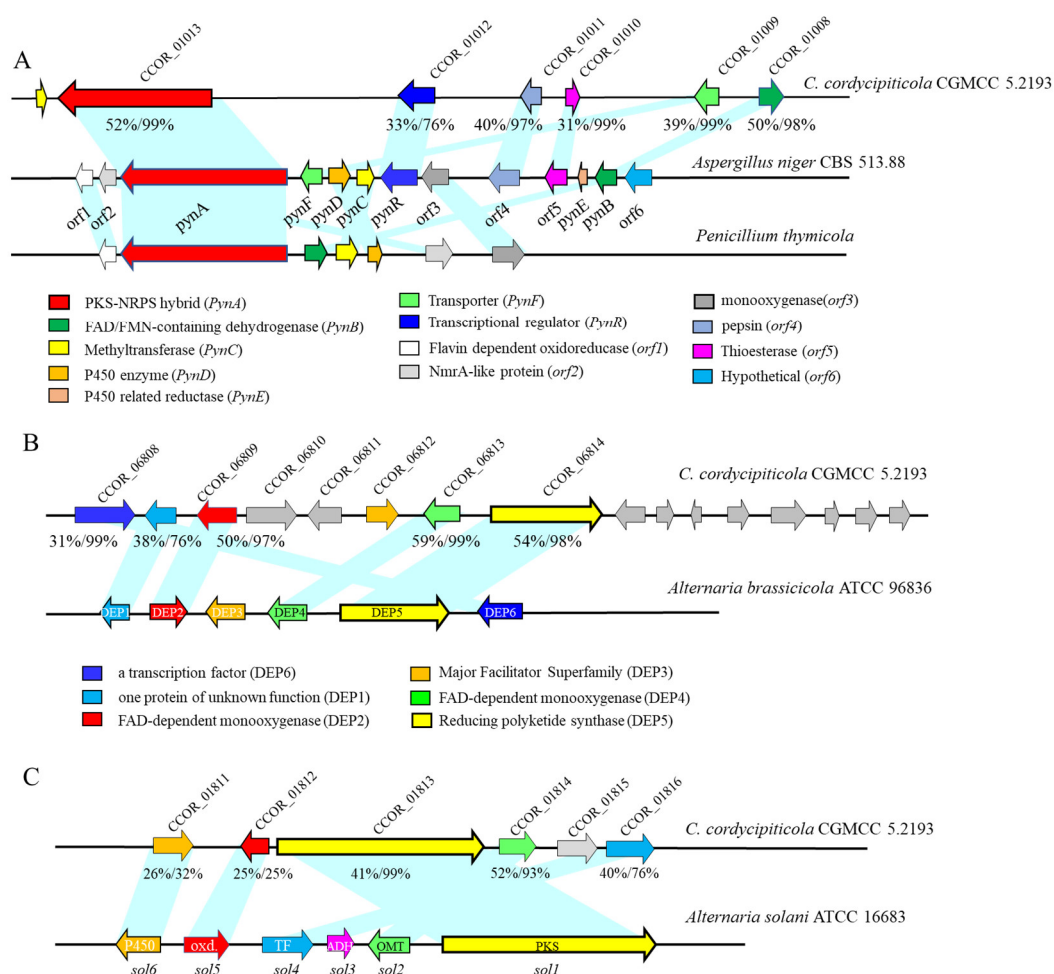

Supplement: s1 [file s1]
